1 *Full Title:*

2 **Nitric Oxide Mediates Neuro-Glial Interaction that Shapes *Drosophila* Circadian Behavior**

3

4 *Short Title:*

5 Nitric Oxide and *Drosophila* Circadian Rhythms

6

7 ***Authorship and Affiliations:***

8

9 Anatoly Kozlov<sup>1</sup> and Emi Nagoshi<sup>1\*</sup>

10

11 <sup>1</sup>Department of Genetics and Evolution, Sciences III, University of Geneva, 30 Quai Ernest-

12 Ansermet, Geneva-4, CH-1211, Switzerland

13

14 \*Corresponding Author

15 Email: Emi.Nagoshi@unige.ch

16

## 17 **Abstract**

18

19 *Drosophila* circadian behavior relies on the network of heterogeneous groups of clock neurons.

20 Short- and long-range signaling within the pacemaker circuit coordinates molecular and neural

21 rhythms of clock neurons to generate coherent behavioral output. The neurochemistry of

22 circadian behavior is complex and remains incompletely understood. Here we demonstrate that

23 the gaseous messenger nitric oxide (NO) is a signaling molecule linking circadian pacemaker to

24 rhythmic locomotor activity. We show that two independent mutants lacking nitric oxide

25 synthase (NOS) have severely disturbed locomotor behavior both in light-dark cycles and

26 constant darkness, although molecular clocks in the main pacemaker neurons are unaffected.

27 Behavioral phenotypes are due in part to the malformation of neurites of the main pacemaker

neurons, s-LNvs. Using cell-type selective and stage-specific gain- and loss-of-function of NOS, we demonstrate that NO secreted from diverse cellular clusters non-cell-autonomously affect molecular and behavioral rhythms. We further identify glia as a major source of NO that regulates circadian locomotor output. These results reveal for the first time the critical role of NO signaling in the *Drosophila* circadian system and highlight the importance of neuro-glial interaction in the neural circuit output.

## Author summary

Circadian rhythms are daily cycles of physiological and behavioral processes found in most plants and animals on our planet from cyanobacteria to humans. Circadian rhythms allow organisms to anticipate routine daily and annual changes of environmental conditions and efficiently adapt to them. Fruit fly *Drosophila melanogaster* is an excellent model to study this phenomenon, as its versatile toolkit enables the study of genetic, molecular and neuronal mechanisms of rhythm generation. Here we report for the first time that gasotransmitter nitric oxide (NO) has a broad, multi-faceted impact on *Drosophila* circadian rhythms, which takes place both during the development and the adulthood. We also show that one of the important contributors of NO to circadian rhythms are glial cells. The second finding highlights that circadian rhythms of higher organisms are not simply controlled by the small number of pacemaker neurons but are generated by the system that consists of many different players, including glia.

## Introduction

Our environment undergoes daily fluctuations in solar illumination, temperature, and other parameters. Organisms across the phylogenetic tree are equipped with circadian clocks, which help predict daily environmental changes and create temporal patterns of behavioral and

56 physiological processes in concordance with the environmental cycle. *Drosophila melanogaster*  
57 remains a handy model to study this phenomenon ever since Konopka and Benzer identified the  
58 first clock gene, *period*, in this organism (1).

59 *Drosophila* circadian clocks rely on transcriptional-translational feedback loops that  
60 operate using an evolutionarily conserved principle. In the main loop, CLOCK/CYCLE  
61 (CLK/CYC) heterodimers bind to the E-boxes in the promoter regions of the *period* (*per*) and  
62 *timeless* (*tim*) genes and activate their transcription. PER and TIM proteins undergo post-  
63 translational modifications and enter the nucleus to suppress their own production by inhibiting  
64 CLK/CYC activity. CLK/CYC also activates transcription of the genes encoding the basic-zipper  
65 regulators PAR DOMAIN PROTEIN 1 (PDP-1) and VRILLE (VRI), which activates and  
66 inhibits *Clk* gene expression, respectively. Thus, positive- and negative- feedback loops created  
67 by PDP-1 and VRI with CLK/CYC are interlocked with the main negative-feedback loop and  
68 ensure the generation of 24-h rhythms (2,3).

69 In the fly brain, molecular clocks are present in ca.150 so-called clock neurons, which  
70 form the pacemaker circuit controlling circadian behavior. Clock neurons are classified into  
71 groups according to their morphological characteristics and location: small and large lateral  
72 ventral neurons (s- and l-LNVs), lateral dorsal neurons (LNDs), lateral posterior neurons (LPNs)  
73 and three groups of dorsal neurons (DN1s, DN2s, DN3s) (4,5). Although all clock neurons  
74 express a common set of clock genes, they are heterogeneous in terms of  
75 neurotransmitter/neuropeptide phenotype, function, and composition of the molecular clock.  
76 Neuropeptide pigment-dispersing factor (PDF) is uniquely secreted from the l-LNVs and 4 out of  
77 5 s-LNVs. Several other neuropeptides, including small neuropeptide F (sNPF) and ion transport  
78 peptide (ITP), and classical neurotransmitters such as glutamate and glycine, are also expressed  
79 across pacemaker circuit (6,7). PDF-positive s-LNVs are designated as the Morning (M)  
80 oscillator, whereas LNDs together with the PDF-negative 5th s-LNV consist of the Evening (E)  
81 oscillator. Under the light-dark (LD) experimental conditions, the M and E oscillators drive the

82 morning and evening anticipatory increments of locomotor activity, respectively. The M  
83 oscillator is also the master pacemaker of the free-running locomotor rhythms in constant  
84 darkness (DD) (8–10).

85 Neuropeptide PDF as well as the unique composition and regulatory mechanisms of the  
86 molecular clock underlie the distinct role of the M oscillator. The main negative-feedback loop  
87 of the M oscillator's molecular clock employs a specific phosphorylation program that regulates  
88 the nuclear translocation of PER/TIM complex (11). The nuclear receptor UNFULFILLED  
89 (UNF) is almost uniquely present in the lateral neurons within the circadian circuit (12,13). UNF  
90 accumulates rhythmically in the s-LNvs and, in cooperation with another nuclear receptor E75,  
91 enhances CLK-dependent *per* transcription. Thus, UNF and E75 consist a positive limb of an  
92 additional feedback loop in specific to the s-LNv molecular clock. Because UNF and E75 also  
93 play critical roles in the development of the s-LNvs, knockdown of either gene during  
94 development or adulthood results in low rhythmicity and extended period, respectively (12,14).

95 Nuclear receptors (NRs) are a superfamily of proteins that function as ligand-dependent  
96 transcriptional regulators (15). The ligands are small lipophilic molecules that can diffuse across  
97 the cell membrane, such as thyroid and steroid hormones. In *Drosophila melanogaster*, only two  
98 lipophilic hormones, 20-hydroxyecdysone (20E) and the sesquiterpenoid juvenile hormone (JH)  
99 are known nuclear receptor ligands, which have critical roles in developmental processes,  
100 including molting, puparium formation, and neurogenesis (15–17). Although many NRs remain  
101 orphan without a known ligand, diatomic gases nitric oxide (NO) and carbon monoxide (CO)  
102 can bind and regulate the activity of some NRs. Several studies have demonstrated *in vitro* and  
103 *in vivo* that NO binds to E75 and regulates its interaction with DHR3 (18), SMRTER (19), and  
104 UNF (20) in different tissues during development. Thus, the binding of NO to E75 confers an  
105 important switching mechanism in various developmental processes.

106 NO is an unconventional messenger involved in numerous biological functions, including  
107 immune defense, respiration, intracellular signaling and neurotransmission (21,22). NO can act

108 locally near the source of its production. It can diffuse across membranes and also act as a long-  
 109 range signaling molecule (22,23). NO signaling is broadly classified into the classical pathway  
 110 mediated by cGMP and cGMP-independent non-classical one involving diverse mechanisms  
 111 such as posttranslational modifications and transcriptional regulations (22,24). In mammals, the  
 112 importance of NO signaling in the light-dependent phase-resetting and maintenance of  
 113 rhythmicity (25–28) is established. These effects were largely explained by the canonical  
 114 NO/cGMP signaling (29–31). However, whether NO has a regulatory role in *Drosophila*  
 115 circadian behavior has never been addressed.

116 Here we explore the role of NO in circadian locomotor behavior of *Drosophila* using  
 117 multiple genetic approaches. We present evidence that NO signaling is necessary for both light-  
 118 dependent and free-running circadian behavior. NO acts cell-autonomously as well as non-cell-  
 119 autonomously at multiple processes required for generating behavior, including axonal  
 120 morphogenesis, pacing of molecular clocks and output control. We identify glial cells as a major  
 121 source of NO that controls free-running locomotor output. Our results highlight the complexity  
 122 of locomotor behavior regulation and oft-neglected importance of glia in the regulation of  
 123 behavior.

## 124 **Results**

### 125 ***dNOS* deletion mutants show abnormal circadian behavior**

127 NO is chiefly produced by an enzyme nitric oxide synthase (NOS) through the conversion of  
 128 arginine into citrulline using NADPH as a cofactor (32,33). Three distinct NOS isoforms  
 129 (endothelial e-NOS, inducible i-NOS, and neuronal n-NOS) exist in mammals, whereas  
 130 *Drosophila* has a single *NOS* (*dNOS*) gene that produces 10 splice variants (Fig. S1) (34). Since  
 131 NOS functions as homodimers, alternatively spliced variants, most of which encode truncated  
 132 proteins, are proposed to act as dominant negatives (35). To investigate the possible roles of NO  
 133 in fly circadian rhythms, we took advantage of two *NOS* CRISPR deletion mutants, *NOS*  $\Delta all$ ,  
 134 and *NOS*  $\Delta ter$  (20). The former has a deletion of the entire NOS locus, while the latter is a

135 partial deletion mutant lacking exons 1 to 6 but bears intact two uncharacterized genes within the  
136 *NOS* locus (Fig 1A). RT-qPCR using the primers targeting the exons commonly included in all  
137 variants (exon 10 and 11) confirmed the absence of the full-length *NOS1* mRNA expression in  
138 *NOS Δall* mutants (Fig. 1B) A reduced level of the product was detected in *NOS Δter* mutants,  
139 consistent with the location of the deletion. Furthermore, we directly measured NO production in  
140 cultured whole brains using a fluorescent dye DAR4-M (36). NO was virtually undetectable in  
141 both *NOS Δall* and *NOS Δter* strains in this assay, confirming that both are complete loss-of-  
142 function mutants (Fig. 1C).

143 Having validated the deletion mutants, we next tested their locomotor activities in LD  
144 and DD paradigms. Homozygous mutants had strongly reduced rhythmicity in DD. Trans-  
145 heterozygous of two deletion alleles was equally detrimental to DD rhythmicity, whereas  
146 heterozygous mutations had no effect on rhythmicity (Table 1 and Fig. 2A). Moreover, morning  
147 activity patterns in LD were strongly impaired in homozygous and trans-heterozygous mutants,  
148 nearly lacking both anticipatory increments of activity before lights-on and the startling reaction  
149 to light (Fig. 2B). The severe reduction of the startling response to light suggests an impairment  
150 in photoreception through the compound eyes known to be necessary for this phenomenon  
151 (37,38). This is consistent with the fact that NO/cGMP signaling is necessary for neurites  
152 patterning of the receptor neurons in the optic lobe during development (39). On the other hand,  
153 low rhythmicity in DD and poor morning anticipation are indicative of the dysfunction of the s-  
154 LNvs, the Master and Morning oscillator.

155

# **156 NOS is a regulator of morphogenesis of the s-LNv axons**

157 NO signaling plays critical roles in various developmental processes in the nervous system,  
158 including neurite patterning of the visual system and axon pruning/regrowth of mushroom body  
159 (MB) neurons (18–20,39,40). Therefore, to explore the possible effect of *NOS* loss-of-function  
160 on the development of the s-LNvs, we expressed a membrane-targeted yellow fluorescent

161 protein mCD8::VENUS with the *gal1118-Gal4* driver and visually inspected s-LNv axonal  
 162 morphology. To our surprise, normally a very orderly branching pattern of terminal neurites was  
 163 severely disturbed in *NOS* homozygous mutants (Fig. 3A). The neurites were extended in length  
 164 and branching pattern was highly disordered and fuzzy (Fig. 3A and B). Circadian change of  
 165 axonal termini (41) was not evident in mutants due to the highly disordered structure. This  
 166 disorderly morphology is reminiscent of the axon pruning defects of MB neurons in *NOS*  
 167 deletion mutants (20). Since NO promotes MB neuron axon pruning and degeneration by  
 168 inhibiting UNF/E75 heterodimer formation (20), we wondered if similar mechanisms are  
 169 involved in the structural maturation of the s-LNvs. To probe this idea, we visualized s-LNv  
 170 projections by expressing mCD8::VENUS while constitutively knocking down UNF. We found  
 171 that s-LNv axonal morphology was affected in a similar manner in this condition, having more  
 172 numerous and disordered neurites than the control (Suppl. Fig S2). These results suggest that  
 173 *NOS* is necessary for axonal morphogenesis of the s-LNvs and part of its role may be via  
 174 controlling the activity of UNF.

175 To better understand the nature of the low rhythmicity in *NOS* mutants, we also  
 176 performed around-the-clock immunostaining of a key clock component PER on the third day of  
 177 constant darkness (DD3). Neither the phase nor the amplitude of the molecular clocks of the s-  
 178 LNvs was affected in *NOS* mutants. Molecular clocks of the LNds also maintained high-  
 179 amplitude 24-h rhythms in mutants (Fig. 3C). Therefore, the arrhythmic behavioral phenotype of  
 180 *NOS*  $\Delta$  mutants is uncoupled from the state of the molecular clocks and caused by the  
 181 developmental impairments. It probably entails the wrong synaptic connectivity of the  
 182 malformed s-LNvs axonal terminals, in addition to defects in possibly many other cells involved  
 183 in locomotor output. Malformation of s-LNv axons is likely to be also responsible for lack of  
 184 morning anticipatory behavior.

185

# 186 **NO from diverse cellular groups can modulate the state of the molecular clocks and** 187 **behavioral output**

188 Whereas NOS is undoubtedly important for developmental processes, the fact that NO continues  
189 to be produced in the brains of adult flies (Fig. 1C) suggests that NO may also have a post-  
190 developmental role in regulating circadian rhythms. It was previously shown using an anti-NOS  
191 serum (42) that NOS is expressed almost everywhere in the brain. However, the anti-NOS serum  
192 does not distinguish various NOS isoforms and thus the picture may not be identical to the loci  
193 of active NO production. Separately, classical histochemical studies of NADPH diaphorase  
194 activity of NOS and soluble guanylate cyclase (sGC)/cGMP immunohistochemistry have  
195 suggested that NOS is active in sensory pathways including visual system, in memory circuits  
196 including the calyx of mushroom body, in the central complex and also in some glial cells  
197 (32,39,43–45). Since these were all indirect assessments of NO production, we analyzed the  
198 localization of NO in the brain using the NO-specific fluorescent probe DAR4-M. DAR4-M  
199 staining showed distinct patterns of cell bodies and neurites in many areas. The signal was  
200 particularly high within and around the central complex and in the optic lobe, with cell bodies  
201 arranged in concentric semicircles reminiscent of the laminar and medulla glial cells (46) (Figure  
202 4A). These patterns were overall similar to those described for the localization of NADPH  
203 diaphorase activity and cGC/cGMP. In addition, since DAR4-M staining is not sensitive enough  
204 to assess daily variation of NO production, we examined the temporal expression pattern of the  
205 functional isoform *dNOS1* using qPCR. We found that mRNA of the *dNOS1* was rhythmically  
206 expressed in the fly head, peaking around ZT10 in LD (Fig. 4B), suggesting that overall NO  
207 levels in the brain may be circadian.

208 Interestingly, we detected a slight enrichment of NO-positive fluorescence within the s-  
209 LNvs marked with *gal1118 > mCD8::Venus* (Fig. 4C). This was unexpected because previous  
210 transcriptome studies found very little or no *NOS* expression within the s-LNvs (13,47,48). This  
211 suggests that NO produced elsewhere migrates to the s-LNvs. Within the s-LNvs, transcriptional

212 regulation by E75 and UNF is a unique and important node of the molecular clockwork (12,14).  
 213 Intriguingly, it was shown that heterodimerization of E75 and UNF is controlled by NO *in vivo*  
 214 and *in vitro* (20). Therefore, we asked whether the state of the molecular clocks can be  
 215 modulated by increasing NO within the s-LNvs.

216 To this end, we overexpressed a macrophage-derived constitutively active NOS  
 217 (macNOS) under the UAS control (18) using *Pdf-Gal4* and performed PER staining on DD3  
 218 every 4 h (Fig. 4D). The increase of NO within the PDF positive neurons was confirmed by  
 219 DAR4-M staining (Suppl. Fig. S3). This manipulation lead to a delay of the PER induction phase  
 220 by about 4 h without dampening the amplitude of PER rhythms. The results are consistent with  
 221 the known role of UNF and E75 and regulation of their heterodimerization with NO: high levels  
 222 of NO disrupt UNF/E75 dimer and delays PER rising phase that is normally enhanced by  
 223 UNF/E75.

224 *Pdf>macNOS* flies had a slight extension of free-running period and the reduction in  
 225 rhythmicity. But the reduced rhythmicity was not statistically significant compared with the  
 226 driver control. Because *Pdf-GAL4* is expressed in both s- and l-LNvs, these phenotypes may be a  
 227 compound effect from both cell types. When we expressed macNOS under the s-LNv-specific  
 228 *R6-Gal4* driver, we observed a reduction in rhythmicity but no differences in the period length  
 229 (Table 1). Neither manipulation consistently affected behavioral patterns in LD (Suppl. Fig.S4).  
 230 Therefore, the major behavioral consequence of forced NO production in the s-LNvs is a  
 231 reduction in free-running rhythmicity. This is probably a consequence of the misalignment of  
 232 molecular phases between the s-LNvs and other clock neurons (Fig. 4D).

233 The results of the DAR4-M staining and the finding that NO can regulate the state of the  
 234 molecular clocks prompted us to investigate whether NO produced in specific cell types or brain  
 235 area is important for normal circadian locomotor activity. Therefore, taking into account the  
 236 notion that NO can act both locally and remotely, we selected a set of GAL4 drivers and drove

237 the expression of *macNOS*. Locomotor activity of these flies was assayed in standard LD-DD  
238 conditions.

239 As summarized in Table 1, we used two clock cell-specific drivers *Tim-GAL4* and  
240 *Clk1982-GAL4*; a mushroom body-specific driver *DH52-GAL4*; three generic optic lobe-specific  
241 drivers *GMR33H10-GAL4*, *GMR79D04GAL4*-, and *GMR85B12-GAL4* (Suppl. Table S1); a glia-  
242 specific driver *Repo-GAL4*; and two pan-neuronal drivers *elav-GAL4* and *R57C10-GAL4*.  
243 Strikingly, all of them except *elav-GAL4* induced a reduction of rhythmicity upon  
244 overexpression of *macNOS*. This is most likely because pan-neuronal *elav-GAL4* is a weaker  
245 driver than another pan-neuronal driver *R57C10-GAL4*. The reduction of rhythmicity was  
246 markedly dramatic with *Repo*, *tim* and optic lobe specific drivers. Collectively, these results  
247 indicate that the overproduction of NO is generally disruptive to locomotor rhythms and suggest  
248 that the NO production and clearance should be tightly regulated. LD behavior was not  
249 obviously affected in any manipulation (Suppl. Fig. S4).

250 To find cell types that natively produce and secrete NO and contribute to the control of  
251 locomotor rhythms, we next performed an opposite experiment. We expressed RNAi against  
252 NOS (VDRC #27725) using a similar set of drivers and analyzed its effects on behavioral  
253 rhythms (Table 1). Consistent with the likely absence of NOS within the s-LNvs, NOS RNAi  
254 with *Pdf-GAL4* and *R6-GAL4* did not show any behavioral phenotype. NOS RNAi driven with a  
255 mushroom body driver *DH52-GAL4* caused a reduced rhythmicity, whereas *macNOS* expression  
256 with the same driver had no effect. Most of the other drivers that disrupted rhythms with  
257 *macNOS* expression also reduced behavioral rhythmicity with NOS RNAi. These include a pan-  
258 neuronal driver *R57C10-Gal4*, optic-lobe drivers *79D040-Gal4* and *85B12-Gal4*. The strongest  
259 effect was observed with *Repo-GAL4* and *tim-Gal4*, whereas there was no effect with *Clk1982*-  
260 *Gal4*. Since the expression of *Clk1982-Gal4* is relatively restricted to CLK-positive neurons,  
261 these results suggest TIM-positive glial cells as an important source of NO in the regulation of  
262 circadian locomotion. *Repo-Gal4* driving a second independent RNAi against NOS (TRiP

263 #50675) also reduced free-running rhythmicity (3% rhythmic, period  $24.0 \pm 0$  h, N=31). Another  
 264 VDRC RNAi line (#108433) had no effect on behavior with any driver, which is most likely due  
 265 to an inefficient knockdown compared to the VDRC #27725 line, judging from the NO staining  
 266 intensity (Supplementary figure Fig S5). Behavioral patterns in LD was not affected by NOS  
 267 knockdown in any driver (Suppl. Fig. S4). Altogether, the results of NOS gain- and loss-of-  
 268 function mini screens indicate that NO produced in many different cell types excluding  
 269 pacemaker neurons contribute to generate normal free-running locomotor rhythms.

270

## 271 **NO produced in glia plays an active role in the regulation of locomotor output**

272 Constitutive NOS knockdown may induce developmental malformations in the brain that lead to  
 273 the reduction of rhythmicity, as evidenced by the phenotypes of *NOS*  $\Delta$  mutants (Figs. 2A, 2B,  
 274 3A and 3B). Therefore, to test if NOS is required for active maintenance of rhythmicity after  
 275 eclosion, we performed the adult-specific knockdown of NOS using pan-neuronal, optic lobe  
 276 specific and glial GAL4 drivers combined with the temperature-sensitive GAL4 repressor,  
 277 GAL80<sup>ts</sup> (49) (Table 1). Glia-specific NOS knockdown caused a notably strong reduction of  
 278 rhythmicity. In addition, NOS RNAi driven by the pan-neuronal *R57C10-Gal4* extended the  
 279 free-running period. These results indicate an indispensable role of NO produced in glia for  
 280 generating circadian locomotor output in adult flies, as well as an existence of a neuronal circuit  
 281 through which NO signaling regulates the free-running period.

282

## 283 **Discussion**

284

285 Gaseous signaling molecules play important roles in a myriad of biological processes, including  
 286 circadian rhythms in mammals. NO and CO were proposed to be “light” and “dark”- induced  
 287 messengers that convey information from zeitgebers to the core of the molecular clocks  
 288 (26,50,51). Here we investigated the possible involvement of NO in *Drosophila* circadian

289 rhythms. Our results overall suggests that NO exerts a coordinated, temporarily and spatially  
290 diverse effect on the *Drosophila* circadian system.

291 It is rather surprising that the lack of NOS enzyme is not lethal as NO is part of various  
292 developmental processes (18–20,39,52,53). Nonetheless, *NOS*  $\Delta$  mutants are strongly  
293 arrhythmic, incapable of morning anticipation and exhibit minimum light-induced startle  
294 response. Whereas the absence of light-induced startle phenotype is likely to be explained by  
295 disruptions in light reception through wrong patterning of the receptor cells of the compound eye  
296 (39), lack of anticipation point to the problems with the morning pacemakers, the s-LNvs.  
297 Indeed, axonal terminals of these neurons in the mutants have an utterly wrong shape, suggesting  
298 the wrong or absent synaptic connections with the downstream partners. Together with the  
299 axonal morphology phenotype induced by *UNF* knockdown, it is plausible that NO acts through  
300 *UNF* and its dimerization partner E75 to define the state of the axonal terminals during  
301 development. As in the case of MB neurons (20), this process might involve axon pruning and  
302 regrowth.

303 The functional isoform *dNOS1* showed a circadian variation of its RNA levels throughout  
304 the day, which suggest that levels of NO could cycle. However, *dNOS* is likely to be regulated  
305 by its truncated isoforms in a stage- and cell-type-specific manner, which lays an additional  
306 complexity to the regulation of NO production and probably leads to the heterogeneous and  
307 context-specific variations of NO. Whether its cycling is important or not for the rhythmicity, it  
308 is clear that NO has only a modulatory role in the s-LNvs' molecular clocks, since *UNF* or *E75*  
309 knockdown in the s-LNvs have much stronger effect on molecular clockwork, i.e. dampening of  
310 the PER cycling amplitude and period extension (14,12).

311 In our *NOS-RNAi* mini screen, two non-clock neurons-specific drivers, *GMR79D04* and  
312 *GMR85B12* reduced locomotor rhythmicity in DD. This phenotype was rather specific to  
313 developmental stage, reinforcing the idea that NO is necessary for a proper establishment of  
314 neuronal circuits. A low rhythmicity phenotype produced by knockdown under pan-neuronal

315 driver *GMR57C10-GAL4* backs up this idea. Intriguingly, however, in addition to the low  
 316 rhythmicity, *GMR57C10 > NOS RNAi* in adulthood resulted in an extended period. This raises a  
 317 question on what might be the neuronal subsets that produce NO and contribute to the regulation  
 318 of period length of locomotor activity. The effect must be of a different nature from the  
 319 regulation of *per* transcription by UNF/E75. An interesting hint comes from a recent study by the  
 320 group of G. Rubin (54), which shows that NO acts as a co-transmitter in a subset of  
 321 dopaminergic neurons, specifically in some of the PAMs, PPL1s and PPL2abs. It is thus possible  
 322 that dopamine signaling regulated by NO is involved in the control of locomotor activity period.

323 Targeting glial cells leads to the strongest and most persistent phenotype in locomotor  
 324 activity both for gain- and loss-of-function of NOS. The importance of glia in circadian rhythms  
 325 have been recognized, especially those expressing the molecular clocks and exert reciprocal  
 326 communication with the pacemaker neural circuit (55,56). Our study is the first to identify NO as  
 327 a signaling molecule produced in glia that mediates part of the role of glia in circadian  
 328 behavioral in flies. It has been shown that in mammals NO mediates light-induced phase-shifts  
 329 through the cGMP pathway (31). It is an interesting parallel to note that forced production of NO  
 330 in the s-LNvs caused phase shift rather than amplitude dampening, although we speculate that  
 331 part of this effect comes from NO hampering E75/UNF dimerization that normally enhances  
 332 CLK/CYC-mediated *per* transcription. Mammalian clocks contain E75 homologs REV-ERB  $\alpha/\beta$   
 333 that work with another nuclear receptor, ROR. In contrast to flies, REV-ERB  $\alpha/\beta$  have a  
 334 repressive function within the clocks, inhibiting transcription of *BMAL1*, a mammalian analog of  
 335 *CYC*. Interestingly, *in vitro* studies of mammalian cell culture showed that excessive presence of  
 336 NO increases the production of *BMAL1*, consistently with the hypothesis that NO decreases  
 337 REV-ERB  $\alpha/\beta$  activity (57). These findings altogether point out that NO is an evolutionarily  
 338 conserved regulator of circadian rhythms.

339 In line with recent studies (7,58,59), our research expands the view on the factors that  
 340 participate in neuronal and molecular mechanisms of circadian rhythmicity. The finding that

gaseous messenger NO contributes to the various aspects of circadian rhythmicity, from development to the maintenance, emphasizes that non-cell-autonomous, systemic regulation is integral to the circadian circuit operation. Our results set a foundation for future studies addressing whether or not specific glial or neuronal classes are required in this regulation and how the NO signaling modulates the state of the pacemaker circuit.

## Materials and Methods

### *Fly rearing, crosses, and strains*

*Drosophila* were reared at 25 °C on a corn-meal medium under 12 hr:12 hr light-dark (LD) cycles. Two CRISPR deletion mutants *NOS*  $\Delta$ *ter*, *NOS*  $\Delta$ *all* were kindly provided by O. Schuldiner (20). The *UAS-macNOS* line was originally generated by H. Krause (18) and provided also by O. Schuldiner. The drivers *GMR57C10*, *GMR79D04*, *GMR85B12*, *GMR33H10* (60) as well as *UAS-NOS-RNAi*<sup>56675</sup> were obtained from Bloomington Stock Center (Indiana, US). The UAS lines *NOS-RNAi*<sup>27725</sup> and *NOS-RNAi*<sup>108433</sup> were obtained from the Vienna *Drosophila* Resource Centre (VDRC). The *Clk1982-Gal4* line was provided by N.R. Glossop (61). The lines *Pdf-Gal4* (62), *Repo-Gal4* (63), *OK107-Gal4* (64), *D52H-Gal4* (65), *GMR-Gal4* (66), *Elav-Gal4* (67), *R6-Gal4* (68), *UAS-miR unf* (12,14) were described previously.

### *Behavioral Assays*

The locomotor behavior assay was performed as described previously (12) and data were analyzed using FaasX software (69). Briefly, male flies were first entrained in 12 h/12 h LD cycles for 4 days and then released in DD for 7–10 days. The flies with power over 20 and width over 2.5h according to the  $\chi^2$  periodogram analysis were defined as rhythmic. The significance threshold was set to 5%. The  $\chi^2$  test was used to compare the rhythmicity of the flies, and the Student's *t* test (2-tailed) was used to compare the free-running period.

### *Immunocytochemistry, microscopy and quantification*

The brains were imaged using a Leica SP5 confocal microscope. At least 10 brain hemispheres

369 were subjected to analysis using Image J software (National Institutes of Health). The anti-PER  
370 signal was quantified as previously described (12).

### 371 ***Nitric oxide visualization and measurements***

372  
373 NO visualization was performed as described in (20) with minor modifications. Brains were  
374 dissected in PBS and incubated with 10  $\mu$  M Diaminorhodamine-4M AM (DAR-4M, Sigma-  
375 Aldrich) in PBS for 1 h at RT, followed by the fixation for 15 min in PBS containing 4%  
376 paraformaldehyde. Immediately after the fixation brains were mounted and imaged. For NO  
377 measurements at different times of the day, the procedure was exactly the same with the  
378 omission of the fixation step. Long-term NO measurement in *ex-vivo* brain culture was  
379 performed as described in (70). Briefly, brains were dissected on an ice-cold plate in modified  
380 Schneider's medium (SM<sup>active</sup>) (71) with an addition of 5 mM Bis-Tris (Sigma) and then  
381 mounted on a glass-bottom dish (35 mm MatTek petri dish, 20 mm microwell with 0.16/0.19  
382 mm coverglass). The glass-bottom well was filled with the SM<sup>active</sup> medium with 10  $\mu$  M  
383 DAR-4M. Time-lapse imaging was performed at 25 ° C and 80%, with images acquired every  
384 hour.

### 385 ***RNA analysis***

386  
387 Total RNA was isolated from adult fly heads using Trizol (Invitrogen) following the  
388 manufacturer's protocol. The RNA was reverse-transcribed using oligo(dT) primers, and the  
389 resulting cDNAs were quantified using real-time qPCR as previously described (47). The mRNA  
390 levels of *dNOS1* were normalized to those of *elongation factor 1 (Ef1)*.

## 391 **Acknowledgments**

392  
393 We thank O. Schuldiner and N. Glossop, the Bloomington Drosophila Stock Center and Vienna  
394 Drosophila Resource Center for fly stocks. We are grateful for our lab members for valuable  
395 discussions on this work.

## References

1. Konopka RJ, Benzer S. Clock mutants of *Drosophila melanogaster*. *Proc Natl Acad Sci USA*. 1971 Sep;68(9):2112–6.
2. Hurley JM, Loros JJ, Dunlap JC. Circadian Oscillators: Around the Transcription–Translation Feedback Loop and on to Output. *Trends in Biochemical Sciences*. 2016 Oct;41(10):834–46.
3. Hardin PE. Molecular Genetic Analysis of Circadian Timekeeping in *Drosophila*. In: *Advances in Genetics* [Internet]. Elsevier; 2011 [cited 2019 Apr 1]. p. 141–73. Available from: <https://linkinghub.elsevier.com/retrieve/pii/B9780123876904000052>
4. Helfrich-Förster C. Development of pigment-dispersing hormone-immunoreactive neurons in the nervous system of *Drosophila melanogaster*. *J Comp Neurol*. 2007 Apr 14;380(3):335–54.
5. Schubert FK, Hagedorn N, Yoshii T, Helfrich-Förster C, Rieger D. Neuroanatomical details of the lateral neurons of *Drosophila melanogaster* support their functional role in the circadian system. *J Comp Neurol*. 2018 01;526(7):1209–31.
6. Beckwith EJ, Ceriani MF. Communication between circadian clusters: The key to a plastic network. *FEBS Lett*. 2015 Nov 14;589(22):3336–42.
7. Frenkel L, Muraro NI, Beltrán González AN, Marcora MS, Bernabó G, Hermann-Luibl C, et al. Organization of Circadian Behavior Relies on Glycinergic Transmission. *Cell Rep*. 2017 04;19(1):72–85.
8. Stoleru D, Peng Y, Agosto J, Rosbash M. Coupled oscillators control morning and evening locomotor behaviour of *Drosophila*. *Nature*. 2004 Oct 14;431(7010):862–8.
9. Grima B, Chélot E, Xia R, Rouyer F. Morning and evening peaks of activity rely on different clock neurons of the *Drosophila* brain. *Nature*. 2004 Oct 14;431(7010):869–73.
10. Picot M, Cusumano P, Klarsfeld A, Ueda R, Rouyer F. Light activates output from evening neurons and inhibits output from morning neurons in the *Drosophila* circadian clock. *PLoS Biol*. 2007 Nov;5(11):e315.
11. Top D, Harms E, Syed S, Adams EL, Saez L. GSK-3 and CK2 Kinases Converge on Timeless to Regulate the Master Clock. *Cell Reports*. 2016 Jul 12;16(2):357–67.
12. Beuchle D, Jaumouillé E, Nagoshi E. The Nuclear Receptor unfulfilled Is Required for Free-Running Clocks in *Drosophila* Pacemaker Neurons. *Current Biology*. 2012 Jul;22(13):1221–7.
13. Abruzzi KC, Zadina A, Luo W, Wiyanto E, Rahman R, Guo F, et al. RNA-seq analysis of *Drosophila* clock and non-clock neurons reveals neuron-specific cycling and novel candidate neuropeptides. *PLoS Genet*. 2017;13(2):e1006613.
14. Jaumouillé E, Machado Almeida P, Stähli P, Koch R, Nagoshi E. Transcriptional regulation via nuclear receptor crosstalk required for the *Drosophila* circadian clock. *Curr Biol*. 2015 Jun 1;25(11):1502–8.
15. King-Jones K, Thummel CS. Nuclear receptors — a perspective from *Drosophila*. *Nat Rev Genet*. 2005 Apr;6(4):311–23.
16. Alyagor I, Berkun V, Keren-Shaul H, Marmor-Kollet N, David E, Mayseless O, et al. Combining Developmental and Perturbation-Seq Uncovers Transcriptional Modules Orchestrating Neuronal Remodeling. *Developmental Cell*. 2018 Oct 8;47(1):38–52.e6.
17. Uryu O, Ameku T, Niwa R. Recent progress in understanding the role of ecdysteroids in adult insects: Germline development and circadian clock in the fruit fly *Drosophila melanogaster*. *Zoological Lett*. 2015 Dec;1(1):32.
18. Caceres L, Necakov AS, Schwartz C, Kimber S, Roberts IJH, Krause HM. Nitric oxide coordinates metabolism, growth, and development via the nuclear receptor E75. *Genes & Development*. 2011 Jul 15;25(14):1476–85.
19. Johnston DM, Sedkov Y, Petruk S, Riley KM, Fujioka M, Jaynes JB, et al. Ecdysone- and

- 447 NO-mediated gene regulation by competing EcR/Usp and E75A nuclear receptors during  
448 *Drosophila* development. *Mol Cell*. 2011 Oct 7;44(1):51–61.
- 449 20. Rabinovich D, Yaniv SP, Alyagor I, Schuldiner O. Nitric Oxide as a Switching  
450 Mechanism between Axon Degeneration and Regrowth during Developmental Remodeling.  
451 *Cell*. 2016 Jan;164(1–2):170–82.
- 452 21. Forstermann U, Sessa WC. Nitric oxide synthases: regulation and function. *European*  
453 *Heart Journal*. 2012 Apr 1;33(7):829–37.
- 454 22. Bicker G. Sources and targets of nitric oxide signalling in insect nervous systems.  
455 *Cell and Tissue Research*. 2001 Jan 29;303(2):137–46.
- 456 23. Lancaster JR. A Tutorial on the Diffusibility and Reactivity of Free Nitric Oxide. *Nitric*  
457 *Oxide*. 1997 Feb 1;1(1):18–30.
- 458 24. Toledo JC, Augusto O. Connecting the Chemical and Biological Properties of Nitric  
459 *Oxide*. *Chem Res Toxicol*. 2012 May 21;25(5):975–89.
- 460 25. Masutani H, Nagai K, Nakagawa H. Possible involvement of nitric oxide in generation  
461 of circadian rhythm. *Biological Rhythm Research*. 1994 Nov 1;25(4):433–41.
- 462 26. Ding JM, Chen D, Weber ET, Fauman LE, Rea MA, Gillette MU. Resetting the biological  
463 clock: mediation of nocturnal circadian shifts by glutamate and NO. *Science*. 1994 Dec  
464 9;266(5191):1713–7.
- 465 27. Watanabe A, Ono M, Shibata S, Watanabe S. Effect of a nitric oxide synthase  
466 inhibitor, N-nitro-L-arginine methylester, on light-induced phase delay of circadian rhythm  
467 of wheel-running activity in golden hamsters. *Neuroscience Letters*. 1995 Jun 2;192(1):25–  
468 8.
- 469 28. Melo L, Golombek DA, Ralph MR. Regulation of Circadian Photic Responses by Nitric  
470 *Oxide*. *J Biol Rhythms*. 1997 Aug 1;12(4):319–26.
- 471 29. Weber ET, Gannon RL, Rea MA. cGMP-dependent protein kinase inhibitor blocks  
472 light-induced phase advances of circadian rhythms in vivo. *Neuroscience Letters*. 1995 Sep  
473 15;197(3):227–30.
- 474 30. Plano SA, Agostino PV, Iglesia HO de la, Golombek DA. cGMP-Phosphodiesterase  
475 Inhibition Enhances Photic Responses and Synchronization of the Biological Circadian  
476 Clock in Rodents. *PLOS ONE*. 2012 May 10;7(5):e37121.
- 477 31. Golombek DA, Agostino PV, Plano SA, Ferreyra GA. Signaling in the mammalian  
478 circadian clock: the NO/cGMP pathway. *Neurochemistry International*. 2004  
479 Nov;45(6):929–36.
- 480 32. Müller U. The Nitric Oxide System in Insects. *Progress in Neurobiology*. 1997  
481 Feb;51(3):363–81.
- 482 33. Zhou L, Zhu D-Y. Neuronal nitric oxide synthase: Structure, subcellular localization,  
483 regulation, and clinical implications. *Nitric Oxide*. 2009 Jun;20(4):223–30.
- 484 34. Stasiv Y, Regulski M, Kuzin B, Tully T, Enikolopov G. The *Drosophila* Nitric-oxide  
485 Synthase Gene (dNOS) Encodes a Family of Proteins That Can Modulate NOS Activity by  
486 Acting as Dominant Negative Regulators. *Journal of Biological Chemistry*. 2001 Nov  
487 9;276(45):42241–51.
- 488 35. Stasiv Y, Kuzin B, Regulski M, Tully T, Enikolopov G. Regulation of multimers via  
489 truncated isoforms: a novel mechanism to control nitric-oxide signaling. *Genes Dev*. 2004  
490 Aug 1;18(15):1812–23.
- 491 36. Kojima H, Hirotsu M, Nakatsubo N, Kikuchi K, Urano Y, Higuchi T, et al. Bioimaging  
492 of Nitric Oxide with Fluorescent Indicators Based on the Rhodamine Chromophore. *Anal*  
493 *Chem*. 2001 May 1;73(9):1967–73.
- 494 37. Rieger D, Stanewsky R, Helfrich-Förster C. Cryptochrome, Compound Eyes,  
495 Hofbauer-Buchner Eyelets, and Ocelli Play Different Roles in the Entrainment and Masking  
496 Pathway of the Locomotor Activity Rhythm in the Fruit Fly *Drosophila Melanogaster*. *J Biol*  
497 *Rhythms*. 2003 Oct 1;18(5):377–91.

38. Lu B, Liu W, Guo F, Guo A. Circadian modulation of light-induced locomotion responses in *Drosophila melanogaster*. *Genes, Brain and Behavior*. 2008 Oct 1;7(7):730–9.
39. Gibbs SM, Truman JW. Nitric Oxide and Cyclic GMP Regulate Retinal Patterning in the Optic Lobe of *Drosophila*. *Neuron*. 1998 Jan;20(1):83–93.
40. Gibbs SM, Becker A, Hardy RW, Truman JW. Soluble Guanylate Cyclase Is Required during Development for Visual System Function in *Drosophila*. *J Neurosci*. 2001 Oct 1;21(19):7705–14.
41. Fernández MP, Berni J, Ceriani MF. Circadian remodeling of neuronal circuits involved in rhythmic behavior. *PLoS Biol*. 2008 Mar 25;6(3):e69.
42. Kuntz S, Poeck B, Strauss R. Visual Working Memory Requires Permissive and Instructive NO/cGMP Signaling at Presynapses in the *Drosophila* Central Brain. *Current Biology*. 2017 Mar;27(5):613–23.
43. Müller U, Buchner E. Histochemical localization of NADPH-diaphorase in the adult *Drosophila* brain: Is nitric oxide a neuronal messenger also in insects? *Naturwissenschaften*. 1993 Nov;80(11):524–6.
44. Colasanti M, Venturini G. Nitric oxide in invertebrates. *Molecular Neurobiology*. 1998 Dec;17(1–3):157–74.
45. Shah S, Hyde DR. Two *Drosophila* Genes That Encode the  $\alpha$  and  $\beta$  Subunits of the Brain Soluble Guanylyl Cyclase. *J Biol Chem*. 1995 Jun 23;270(25):15368–76.
46. Kremer MC, Jung C, Batelli S, Rubin GM, Gaul U. The glia of the adult *Drosophila* nervous system. *Glia*. 2017 Apr;65(4):606–38.
47. Nagoshi E, Sugino K, Kula E, Okazaki E, Tachibana T, Nelson S, et al. Dissecting differential gene expression within the circadian neuronal circuit of *Drosophila*. *Nature Neuroscience*. 2010 Jan;13(1):60–8.
48. Kula-Eversole E, Nagoshi E, Shang Y, Rodriguez J, Allada R, Rosbash M. Surprising gene expression patterns within and between PDF-containing circadian neurons in *Drosophila*. *Proc Natl Acad Sci USA*. 2010 Jul 27;107(30):13497–502.
49. McGuire SE, Mao Z, Davis RL. Spatiotemporal Gene Expression Targeting with the TARGET and Gene-Switch Systems in *Drosophila*. *Sci STKE*. 2004 Feb 17;2004(220):pl6–pl6.
50. Artinian LR, Ding JM, Gillette MU. Carbon Monoxide and Nitric Oxide: Interacting Messengers in Muscarinic Signaling to the Brain's Circadian Clock. *Experimental Neurology*. 2001 Oct;171(2):293–300.
51. Pardee K, Reinking J, Krause H. Nuclear Hormone Receptors, Metabolism, and Aging: What Goes Around Comes Around. *Sci Aging Knowl Environ*. 2004 Nov 24;2004(47):re8.
52. Ana Maria A, Oscar Andréas M-R, Haider NB. Role of Nuclear Receptors in Central Nervous System Development and Associated Diseases. *J Exp Neurosci*. 2015 Jan;9s2:JEN.S25480.
53. Enikolopov G, Banerji J, Kuzin B. Nitric oxide and *Drosophila* development. *Cell Death Differ*. 1999 Oct;6(10):956–63.
54. Aso Y, Ray R, Long X, Cichewicz K, Ngo T-T, Sharp B, et al. Nitric oxide acts as a cotransmitter in a subset of dopaminergic neurons to diversify memory dynamics. *bioRxiv*. 2019 Jun 26;682815.
55. Suh J, Jackson FR. *Drosophila* Ebony Activity Is Required in Glia for the Circadian Regulation of Locomotor Activity. *Neuron*. 2007 Aug 2;55(3):435–47.
56. Ng FS, Tangredi MM, Jackson FR. Glial cells physiologically modulate clock neurons and circadian behavior in a calcium-dependent manner. *Curr Biol*. 2011 Apr 26;21(8):625–34.
57. Pardee KI, Xu X, Reinking J, Schuetz A, Dong A, Liu S, et al. The Structural Basis of Gas-Responsive Transcription by the Human Nuclear Hormone Receptor REV-ERB $\beta$ . *PLoS Biology*. 2009;7(2):15.

- 549 58. Pérez N, Bernabei-Cornejo SG, Fernandez-Acosta M, Duhart JM, Ceriani MF.  
550 Contribution of non-circadian neurons to the temporal organization of locomotor activity.  
551 Biol Open. 2019 Jan 7;8(1).
- 552 59. Herrero A, Duhart JM, Ceriani MF. Neuronal and Glial Clocks Underlying Structural  
553 Remodeling of Pacemaker Neurons in *Drosophila*. Front Physiol. 2017;8:918.
- 554 60. Jenett A, Rubin GM, Ngo T-TB, Shepherd D, Murphy C, Dionne H, et al. A GAL4-Driver  
555 Line Resource for *Drosophila* Neurobiology. Cell Reports. 2012 Oct 25;2(4):991–1001.
- 556 61. Gummadova JO, Coutts GA, Glossop NRJ. Analysis of the *Drosophila* Clock Promoter  
557 Reveals Heterogeneity in Expression between Subgroups of Central Oscillator Cells and  
558 Identifies a Novel Enhancer Region. J Biol Rhythms. 2009 Oct 1;24(5):353–67.
- 559 62. Renn SC, Park JH, Rosbash M, Hall JC, Taghert PH. A pdf neuropeptide gene mutation  
560 and ablation of PDF neurons each cause severe abnormalities of behavioral circadian  
561 rhythms in *Drosophila*. Cell. 1999 Dec 23;99(7):791–802.
- 562 63. Sepp KJ, Schulte J, Auld VJ. Peripheral glia direct axon guidance across the CNS/PNS  
563 transition zone. Dev Biol. 2001 Oct 1;238(1):47–63.
- 564 64. Connolly JB, Roberts IJ, Armstrong JD, Kaiser K, Forte M, Tully T, et al. Associative  
565 learning disrupted by impaired Gs signaling in *Drosophila* mushroom bodies. Science. 1996  
566 Dec 20;274(5295):2104–7.
- 567 65. Aso Y, Grübel K, Busch S, Friedrich AB, Siwanowicz I, Tanimoto H. The mushroom  
568 body of adult *Drosophila* characterized by GAL4 drivers. J Neurogenet. 2009;23(1–2):156–  
569 72.
- 570 66. Yamada T. EDL/MAE regulates EGF-mediated induction by antagonizing Ets  
571 transcription factor Pointed. Development. 2003 Sep 1;130(17):4085–96.
- 572 67. Luo L, Liao YJ, Jan LY, Jan YN. Distinct morphogenetic functions of similar small  
573 GTPases: *Drosophila* Drac1 is involved in axonal outgrowth and myoblast fusion. Genes  
574 Dev. 1994 Aug 1;8(15):1787–802.
- 575 68. Helfrich-Förster C, Shafer OT, Wülbeck C, Grieshaber E, Rieger D, Taghert P.  
576 Development and morphology of the clock-gene-expressing lateral neurons of *Drosophila*  
577 melanogaster. J Comp Neurol. 2007 Jan 1;500(1):47–70.
- 578 69. Blanchardon E, Grima B, Klarsfeld A, Chélot E, Hardin PE, Prémat T, et al. Defining the  
579 role of *Drosophila* lateral neurons in the control of circadian rhythms in motor activity and  
580 eclosion by targeted genetic ablation and PERIOD protein overexpression. European  
581 Journal of Neuroscience. 2001;13(5):871–88.
- 582 70. Sabado V, Vienne L, Nunes JM, Rosbash M, Nagoshi E. Fluorescence circadian  
583 imaging reveals a PDF-dependent transcriptional regulation of the *Drosophila* molecular  
584 clock. Sci Rep. 2017 30;7:41560.
- 585 71. Küppers-Munther B, Letzkus JJ, Lürer K, Technau G, Schmidt H, Prokop A. A new  
586 culturing strategy optimises *Drosophila* primary cell cultures for structural and functional  
587 analyses. Dev Biol. 2004 May 15;269(2):459–78.
- 588
- 589

## 590 Figure Legends

591

592 **Figure 1. *NOS*  $\Delta$  mutants do not produce nitric oxide.** (A) *NOS* gene, *NOS*  $\Delta$  all, and *NOS*  $\Delta$

593 *ter* mutants and two reverse genes residing within the *NOS* locus. (B) mRNA levels of *NOSI*, a

594 full-length functional isoform of NOS (*NOSd1*), at ZT2 in the heads of *NOS*  $\Delta$  mutants and *w*<sup>1118</sup>

were analyzed using qPCR.  $**p<0.01$  (Student's test). (C) NO levels were measured using DAR4-M dye in the brains of *NOS Δ* mutants and *w<sup>1118</sup>* in brain explants for 4 h using timelapse microscopy.  $**p<0.01$  (Student's test)

598

**Figure 2. NOS deletion impairs the circadian behavior in light-dark cycles and constant**

**darkness.** (A) Locomotor activity histograms for group average activity of *w<sup>1118</sup>* and *NOS Δ*

mutants. (N=32)(B) Histograms of group average activities of *w<sup>1118</sup>* and *NOS Δ* mutants in LD,

an average of 3 days.

603

**Figure 3. NOS deletion causes the malformation of the axons of the s-LNvs but does not**

**affect their molecular clocks.** (A) s-LNv axonal terminal projections were visualized by

expressing *mCD8::Venus* and staining with anti-GFP antibodies at ZT2 and ZT14.

Representative confocal images are shown. (B) Quantifications of the length of the terminal

branches at ZT2. (C) PER levels of *w<sup>1118</sup>* and *NOS Δ* mutants in the s-LNvs and LNDs analyzed

every 4 h on DD3. NOS deletion does not affect PER rhythms.

610

**Figure 4. NO production in the brain and its effect on the s-LNv molecular clocks.** (A)

Intracellular NO staining with DAR4-M staining showed an accumulation of NO in the optic

lobe (OL) and in and around the central complex (CCX) of *w<sup>1118</sup>* flies. (B) Around-the-clock

measurement of the *dNOSI* isoform mRNA levels by qPCR in LD.  $*p<0.05$ ,  $**p<0.01$ ,

$***p<0.001$  (one-way ANOVA test) (C) Enrichment of the DAR4-M signal within the s-LNv

cell body. (D) PER levels of *w<sup>1118</sup>* and *PDF>macNOS* mutants were measured every 4 h on

DD3. Red and black arrows point at the trough of PER rhythms in *Pdf>macNOS* and control

flies, respectively. PER rhythms are delayed by approximately 4 hours in *PDF>macNOS* flies.

## Supporting Information Captions

620

**Supplementary Figure 1. NOS splice isoforms.** dNOS1 and presumably dNOS8 encode functional complete enzyme. The rest isoforms lead to a truncated enzyme. Information is taken from (34). dNOS1-specific primers used are (F) GGC GAG CTT TTC TCC CAG GA, and (R) GAC GAG CCA ATG CTG GAG TC, indicated in red.

**Supplementary Figure 2. Axonal morphogenesis of the s-LNvs relies on UNF.** s-LNv axonal terminals in control (*Pdf-GAL4/+*) and flies with LNv-targeted UNF knockdown (*Pdf-GAL4* driving *UAS-miR unf*, shown as *PDF> UNF-RNAi*) were visualized by co-expressing *mCD8::Venus*. Flies were dissected at ZT2 and stained with anti-GFP antibodies. Representative confocal images are shown.

**Supplementary Figure 3. Upregulation of NO upon macNOS overexpression.** DAR4-M staining of brain expressing *macNOS* in *Pdf-Gal4*. Left, Representative confocal images. Right, comparison of DAR4-M fluorescent levels of a single representative WT and *Pdf> macNOS* brains within the region of s-LNvs.

**Supplementary Figure 4. Cell-restricted manipulation of NOS does not affect LD locomotor behavior.** Locomotor activity histograms for group average activity of macNOS or NOS-RNAi<sup>27725</sup> expressed under indicated drivers. 4 days of LD are shown.

**Supplementary Figure 5 NOS-RNAi efficiency comparison.** DAR4-M staining measures of two *Elav*-driven NOS-RNAi<sup>27725</sup> and NOS-RNAi<sup>108433</sup>. Fluorescence levels were measured broadly in the region of the central brain, approximately in the area of the central complex. RNAi line 27725 induces a significant reduction of DAR4-M signal. \*\**p*<0.01 (Student's test).

## Tables

**Table 1. Free-running locomotor rhythms.**

648

649

| Temperature    | Genotype                          | Period $\pm$ SEM (hr) | Power $\pm$ SEM  | n   | %R       |
|----------------|-----------------------------------|-----------------------|------------------|-----|----------|
| 25°C           | <i>W1118</i>                      | 23.5 $\pm$ 0.05       | 167.5 $\pm$ 9.3  | 124 | 93.6     |
|                | <i>CantonS</i>                    | 24.1 $\pm$ 0.35       | 102.3 $\pm$ 18.0 | 27  | 84.4     |
|                | <i>NOSter/+</i>                   | 23.7 $\pm$ 0.04       | 217.7 $\pm$ 10.5 | 127 | 91.3     |
|                | <i>NOSter</i>                     | 23.2 $\pm$ 0.2        | 84.3 $\pm$ 29.0  | 105 | 21.0***  |
|                | <i>NOSall/+</i>                   | 23.7 $\pm$ 0.04       | 245.1 $\pm$ 12.1 | 126 | 76.9     |
|                | <i>NOSall</i>                     | 23.6 $\pm$ 0.06       | 149.4 $\pm$ 15.5 | 173 | 56.1**   |
|                | <i>NOSall/NOSter</i>              | 23.5 $\pm$ 0.2        | 79.0 $\pm$ 17.4  | 59  | 66.1     |
| macNOS oxp     | <i>&gt;macNOS</i>                 | 23.4 $\pm$ 0.05       | 59.4 $\pm$ 2.1   | 89  | 85.4     |
| LNvs           | <i>PDF&gt;macNOS</i>              | 24.5 $\pm$ 0.15***    | 51.7 $\pm$ 6.1   | 25  | 76.6     |
| s-LNVs         | <i>R6&gt;macNOS</i>               | 23.8 $\pm$ 0.09       | 69.9 $\pm$ 5.2   | 31  | 65.5**   |
| MB             | <i>D52H&gt;macNOS</i>             | 24.2 $\pm$ 0.05       | 145.2 $\pm$ 13.9 | 28  | 92.9     |
| Clock neurons  | <i>tim&gt;macNOS</i>              | 24.7 $\pm$ 0.1****    | 61.3 $\pm$ 6.3   | 30  | 36.7**** |
| Clock neurons  | <i>Clk1982&gt;macNOS</i>          | 23.9 $\pm$ 0.05       | 85.5 $\pm$ 7.6   | 30  | 76.7     |
| OL             | <i>GMR33H10&gt;macNOS</i>         | 23.7 $\pm$ 0.09       | 85.2 $\pm$ 8.7   | 62  | 53.2**** |
| OL             | <i>GMR79D04&gt;macNOS</i>         | 23.9 $\pm$ 0.09       | 43.3 $\pm$ 4.9   | 63  | 28.6**** |
| OL             | <i>GMR85B12&gt;macNOS</i>         | 23.6 $\pm$ 0.1        | 53.1 $\pm$ 7.9   | 60  | 61.7***  |
| Glia           | <i>Repo&gt;macNOS</i>             | 23.5 $\pm$ 0.05       | 98.2 $\pm$ 5.0   | 28  | 29.8**** |
| Pan-neuronal   | <i>GMR57C10&gt;macNOS</i>         | 25.0 $\pm$ 0.4*       | 65.9 $\pm$ 12.9  | 61  | 32.8**** |
| Pan-neuronal   | <i>Elav&gt;macNOS</i>             | 23.7 $\pm$ 0.05       | 83.5 $\pm$ 6.4   | 59  | 81.4     |
| NOS KD         | <i>NOS-RNAi<sup>27725</sup>/+</i> | 23.7 $\pm$ 0.04       | 110.7 $\pm$ 0.04 | 145 | 84.0     |
| LNvs           | <i>PDF&gt;NOS-RNAi</i>            | 24.4 $\pm$ 0.03       | 184.1 $\pm$ 13.9 | 26  | 100      |
| s-LNVs         | <i>R6&gt;NOS-RNAi</i>             | 23.6 $\pm$ 0.04       | 113.0 $\pm$ 5.5  | 60  | 80       |
| MB             | <i>D52H&gt;NOS-RNAi</i>           | 23.6 $\pm$ 0.4        | 105.4 $\pm$ 10.5 | 29  | 65.5*    |
| MB             | <i>OK107&gt;NOS-RNAi</i>          | 23.5 $\pm$ 0.05       | 141.2 $\pm$ 12.0 | 32  | 96.9     |
| Photoreceptors | <i>GMR&gt;NOS-RNAi</i>            | 23.6 $\pm$ 0.06       | 200.1 $\pm$ 12.3 | 60  | 95.2     |
| Clock neurons  | <i>tim&gt;NOS-RNAi</i>            | 24.4 $\pm$ 0.2        | 166.2 $\pm$ 10.4 | 47  | 38.3**** |
| Clock neurons  | <i>Clk1982&gt;NOS-RNAi</i>        | 23.6 $\pm$ 0.02       | 173.3 $\pm$ 5.03 | 62  | 88.7     |
| OL             | <i>GMR33H10&gt;NOS-RNAi</i>       | 23.5 $\pm$ 0.03       | 164 $\pm$ 7.1    | 32  | 96.9     |
| OL             | <i>GMR79D04 &gt;NOS-RNAi</i>      | 25.1 $\pm$ 0.2**      | 105.2 $\pm$ 7.9  | 59  | 61.0**   |
| OL             | <i>GMR85B12 &gt;NOS-RNAi</i>      | 23.6 $\pm$ 0.03       | 121.3 $\pm$ 6.9  | 44  | 70.5**   |
| Glia           | <i>Repo&gt;NOS-RNAi</i>           | 23.6 $\pm$ 0.2        | 79.4 $\pm$ 6.6   | 63  | 32.1**** |
| Pan-neuronal   | <i>GMR57C10&gt;NOS-RNAi</i>       | 26.2 $\pm$ 0.2****    | 121.2 $\pm$ 8.2  | 60  | 55.0**   |
| Pan-neuronal   | <i>elav&gt;NOS-RNAi</i>           | 23.5 $\pm$ 0.05       | 122.3 $\pm$ 9.1  | 95  | 76.8     |
| CTR            | <i>PDF&gt;</i>                    | 24.1 $\pm$ 0.04       | 132.7 $\pm$ 6.9  | 58  | 96.8     |
|                | <i>R6&gt;</i>                     | 23.4 $\pm$ 0.05       | 105.2 $\pm$ 5.7  | 45  | 85.1     |
|                | <i>D52H&gt;</i>                   | 23.9 $\pm$ 0.04       | 177.3 $\pm$ 8.3  | 10  | 90.5     |
|                | <i>OK107&gt;</i>                  | 23.7 $\pm$ 0.06       | 139.6 $\pm$ 8.5  | 30  | 96.8     |
|                | <i>GMR</i>                        | 23.6 $\pm$ 0.03       | 187.5 $\pm$ 6.1  | 28  | 93.3     |
|                | <i>Tim&gt;</i>                    | 24.1 $\pm$ 0.05       | 125.4 $\pm$ 6.3  | 82  | 90.2     |
|                | <i>Clk1982&gt;</i>                | 23.6 $\pm$ 0.03       | 150.6 $\pm$ 7.4  | 60  | 86.7     |

|                       |                             |              |            |     |       |
|-----------------------|-----------------------------|--------------|------------|-----|-------|
|                       | <i>GMR33H10&gt;</i>         | 23.1±0.05    | 144.9±6.2  | 60  | 85.0  |
|                       | <i>GMR79D04 &gt;</i>        | 24.3±0.2     | 96.6±5.5   | 64  | 84.4  |
|                       | <i>GMR85B12 &gt;</i>        | 23.5±0.04    | 128.5±6.9  | 91  | 89.0  |
|                       | <i>Repo&gt;</i>             | 23.3±0.05    | 109.2±6.9  | 83  | 82.0  |
|                       | <i>GMR57C10&gt;</i>         | 24.2±0.2     | 117.9±4.9  | 60  | 78.3  |
|                       | <i>Elav&gt;</i>             | 23.7±0.05    | 143.0±7.8  | 120 | 82.8  |
| <b>18°C -&gt;29°C</b> | <i>Repo&gt;NOS-RNAi</i>     | 24.1±0.5     | 47.2±7.3   | 21  | 47.6* |
| <b>Adult-only KD</b>  | <i>GMR79D04&gt;NOS-RNAi</i> | 24.7±0.3     | 93.1±8.3   | 28  | 75.0  |
|                       | <i>GMR85B12&gt;NOS-RNAi</i> | 25.6±0.3     | 86.0±12.5  | 17  | 56.7  |
|                       | <i>GMR57C10&gt;NOS-RNAi</i> | 26.8±0.07*** | 165.3±11.5 | 25  | 96.0  |
| <b>CTR</b>            | <i>NOS-RNAi/Tub-Gal80ts</i> | 25.6±0.3     | 89.2±6.5   | 29  | 79.3  |
|                       | <i>Repo&gt;</i>             | 23.5±0.6     | 114.2±9.3  | 29  | 72.4  |
|                       | <i>GMR79D04&gt;</i>         | 23.3±0.07    | 76.0±8.7   | 28  | 67.9  |
|                       | <i>GMR85B12&gt;</i>         | 23.2±0.09    | 74.2±15.1  | 28  | 32.1  |
|                       | <i>GMR57C10&gt;</i>         | 23.2±0.06    | 121.7±9.74 | 30  | 86.7  |

650

651  $a_n$ , Number of flies; %R, % of rhythmic flies. Rhythmicity was compared with the driver control  
652 or with control genotypes (*CantonS* for *NOS* mutants) by a  $\chi^2$  test. Periods were compared  
653 with the controls (Student's *t* test): \**p* 0.05; \*\**p* 0.01; \*\*\**p* 0.001; \*\*\*\**p* 0.0001.

654

655

656

# **Supplementary Table S1. Optic lobe-specific drivers.**

Distribution and intensity of the tested generic optic lobe-specific drivers, taken from Janelia Fly Light project. Original characterization was based on the GFP expression. All three optic lobe-specific drivers are enriched in the optic lobes. Occasional expression outside OL is mainly relatively weak in compare with expression in OL.

|                                          |             |                                       | R33H10 | R79D04       | R85B12          | R57C10                               |  |  |
|------------------------------------------|-------------|---------------------------------------|--------|--------------|-----------------|--------------------------------------|--|--|
| antennal lobe                            |             |                                       | 1_2    | 1_1          | 1_5             |                                      |  |  |
| antennal mechanosensory and motor center |             |                                       | 1_3    | 0_5          | 5_0             |                                      |  |  |
| anterior ventrolateral protocerebrum     |             |                                       | 3_0    | 2_1          | 1_1             |                                      |  |  |
| antler                                   |             |                                       | 1_1    | 1_0          | 0_5             |                                      |  |  |
| bulb                                     |             |                                       | 1_4    | 1_0          | 1_0             |                                      |  |  |
| cantle                                   |             |                                       | 1_2    | 0_5          | 1_0             |                                      |  |  |
| crepine                                  |             |                                       | 1_1    | 0_5          | 1_1             |                                      |  |  |
| ellipsoid body                           |             |                                       | 0_5    | 0_5          | 0_5             |                                      |  |  |
| epaulette                                |             |                                       | 1_4    | 2_2          | 1_1             |                                      |  |  |
| fan-shaped body                          |             |                                       | 1_1    | 2_0          | 1_0             |                                      |  |  |
| flange                                   |             |                                       | 2_1    | 2_1          | 2_2             |                                      |  |  |
| gall                                     |             |                                       | 1_2    | 0_5          | 0_5             |                                      |  |  |
| gorget                                   |             |                                       | 1_2    | 3_1          | 1_1             |                                      |  |  |
| inferior bridge                          |             |                                       | 1_1    | 1_0          | 1_0             |                                      |  |  |
| inferior clamp                           |             |                                       | 1_2    | 1_1          | 1_1             |                                      |  |  |
| inferior posterior slope                 |             |                                       | 1_2    | 1_0          | 1_1             |                                      |  |  |
| lateral accessory lobe                   |             |                                       | 1_2    | 3_0          | 1_1             |                                      |  |  |
| lateral horn                             |             |                                       | 1_1    | 1_2          | 1_0             |                                      |  |  |
| mushroom body                            |             |                                       | 1_1    | 1_0          | 1_2             |                                      |  |  |
| noduli                                   |             |                                       | 0_5    | 0_5          | 0_5             |                                      |  |  |
| optic lobe                               |             |                                       | 5_2    | 5_2          | 5_2             |                                      |  |  |
| optic tubercle                           |             |                                       | 2_0    | 0_5          | 2_0             |                                      |  |  |
| posterior lateral protocerebrum          |             |                                       | 1_2    | 2_1          | 1_0             |                                      |  |  |
| posterior ventrolateral protocerebrum    |             |                                       | 2_1    | 1_3          | 1_2             |                                      |  |  |
| protocerebral bridge                     |             |                                       | 0_5    | 1_0          | 1_0             |                                      |  |  |
| prow                                     |             |                                       | 1_4    | 2_3          | 4_1             |                                      |  |  |
| saddle                                   |             |                                       | 2_1    | 1_0          | 4_0             |                                      |  |  |
| subesophageal ganglion                   |             |                                       | 3_2    | 3_0          | 2_1             |                                      |  |  |
| superior clamp                           |             |                                       | 2_1    | 1_1          | 1_0             |                                      |  |  |
| superior intermediate protocerebrum      |             |                                       | 2_1    | 1_0          | 1_1             |                                      |  |  |
| superior lateral protocerebrum           |             |                                       | 1_2    | 1_0          | 2_0             |                                      |  |  |
| superior medial protocerebrum            |             |                                       | 2_1    | 1_1          | 1_2             |                                      |  |  |
| superior posterior slope                 |             |                                       | 1_1    | 1_1          | 0_5             |                                      |  |  |
| vesta                                    |             |                                       | 1_4    | 0_5          | 1_0             |                                      |  |  |
| Gene region                              |             |                                       | Src64b | CG9650       | zf30c           | Nsyb                                 |  |  |
| Intensity                                |             |                                       |        | Distribution |                 |                                      |  |  |
| Value                                    | Description | Criteria for selection                |        | Value        | Description     | Criteria for selection               |  |  |
| 0                                        | blank       | No pattern                            |        | 0            | passing tract   | Tracts passing neuropil              |  |  |
| 1                                        | faint       | Visible with enhanced contrast only   |        | 1            | sparse          | Like one glom in al                  |  |  |
| 2                                        | very weak   | Visible when known with nc82 staining |        | 2            | local, regional | Bigger region or multiple glom in al |  |  |
| 3                                        | weak        | Easily visible with nc82 staining     |        | 3            | widespread      | Less than half of the structure      |  |  |
| 4                                        | strong      | Bright                                |        | 4            | prevalent       | More than half of the structure      |  |  |
| 5                                        | very strong | Really bright                         |        | 5            | ubiquitous      | Everywhere                           |  |  |

Figure 1

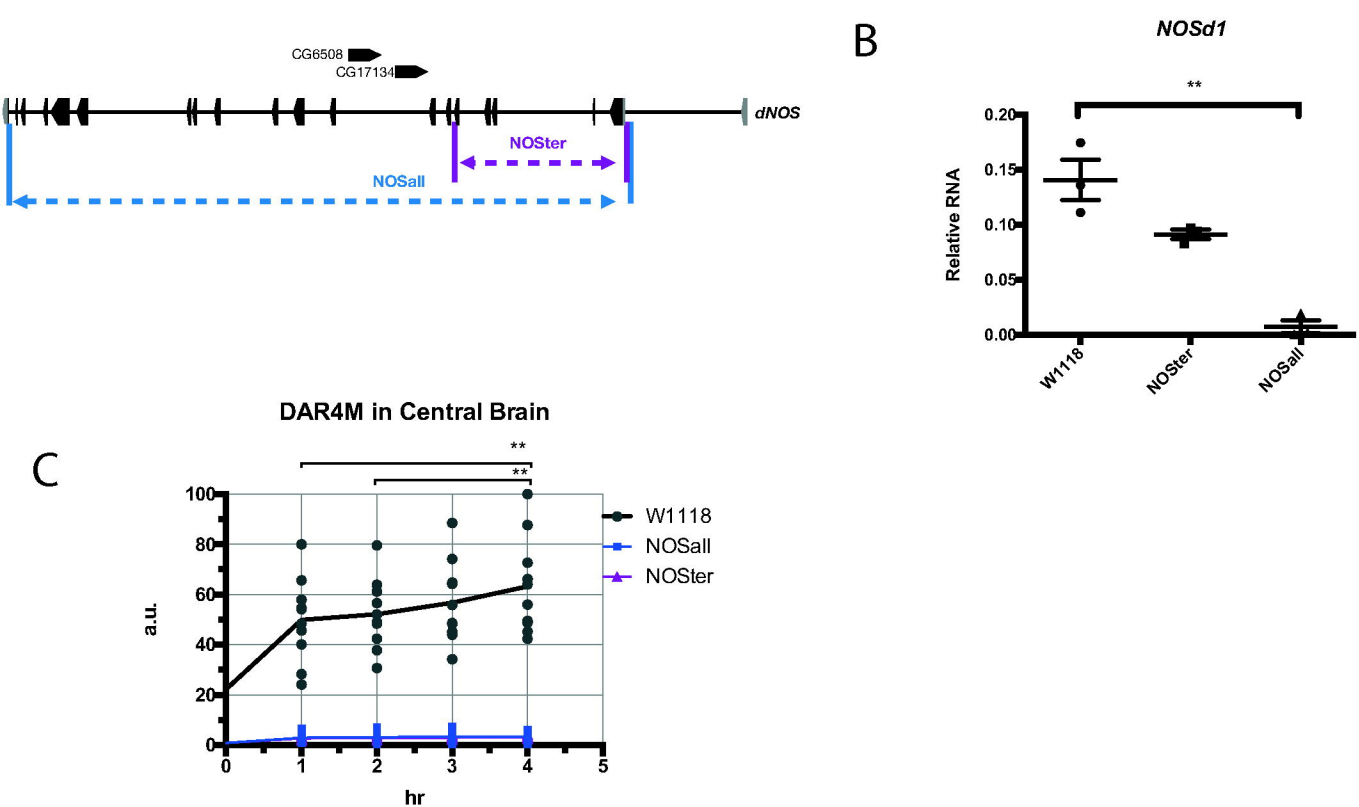

Figure 2

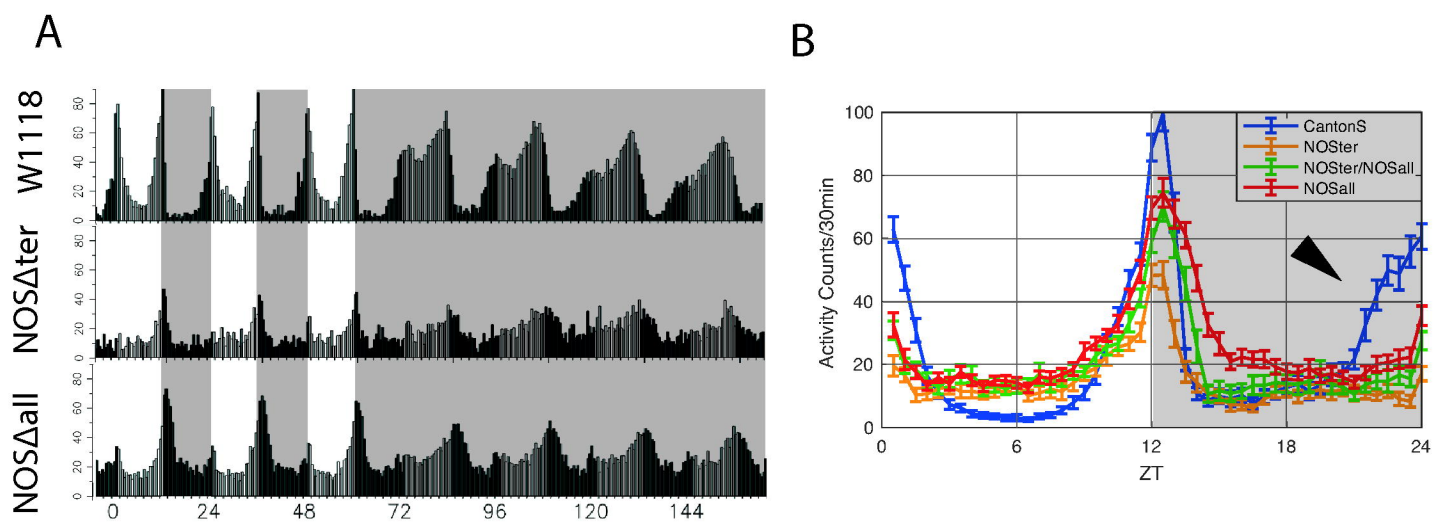

Figure 3

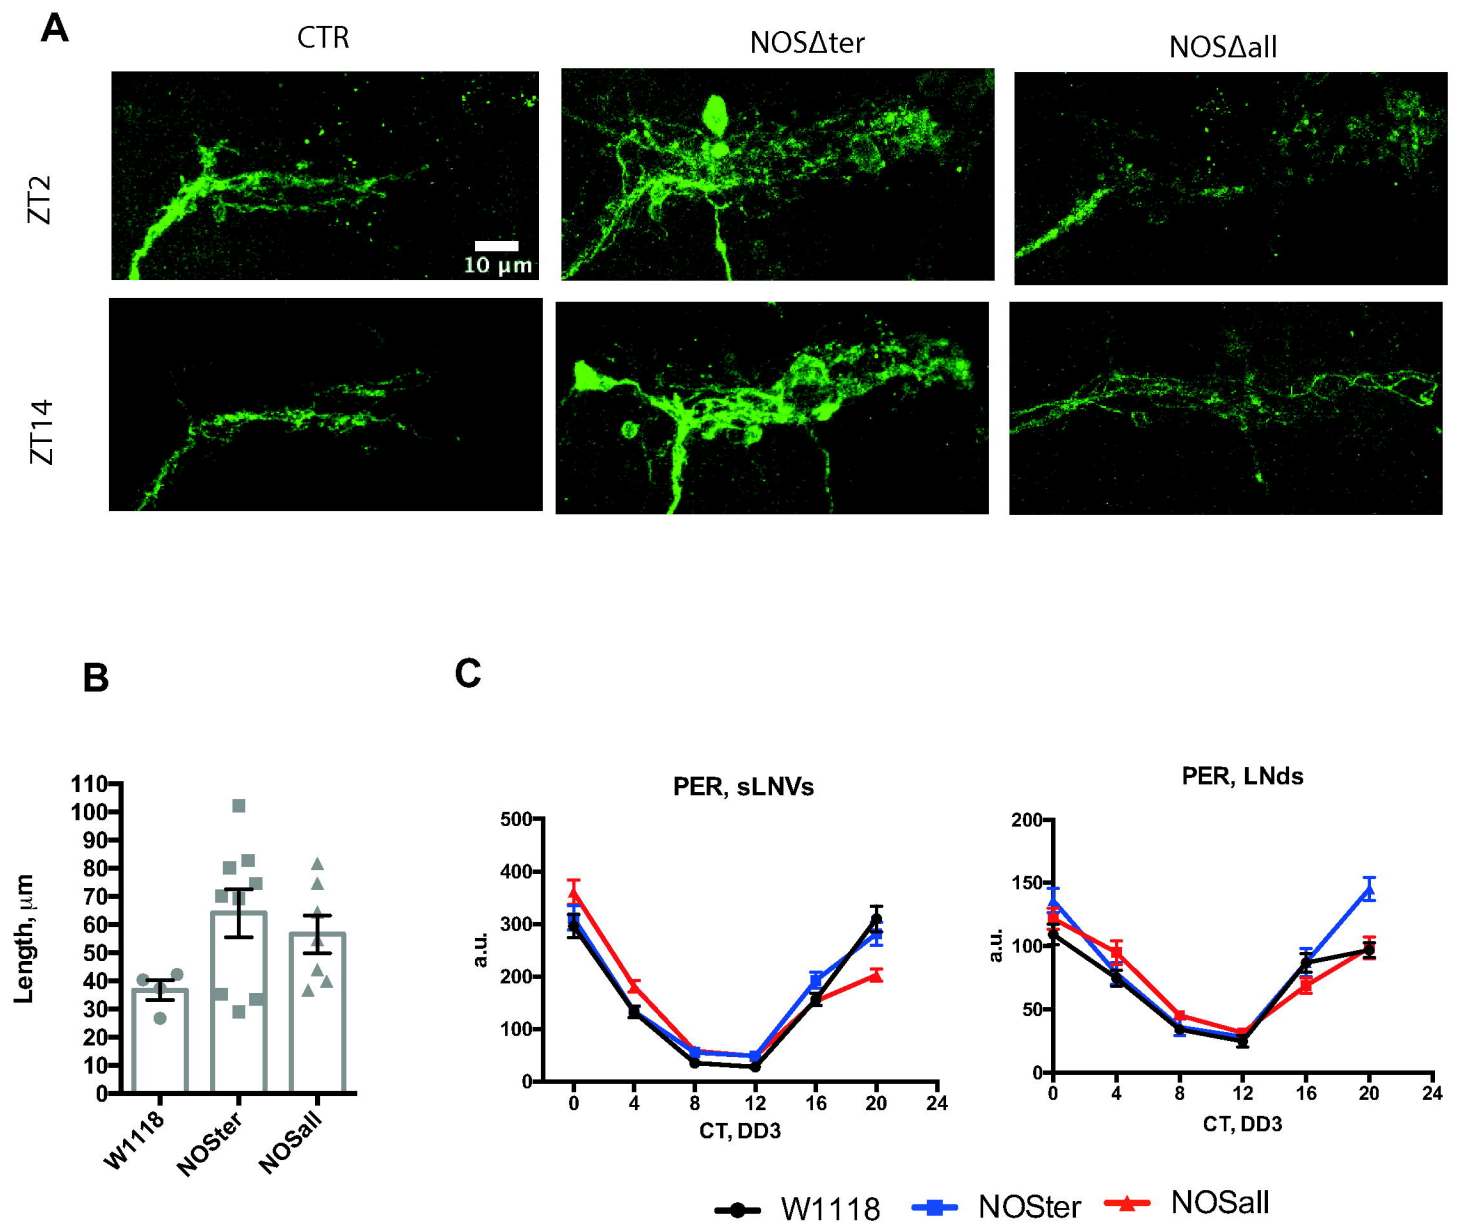

Figure 4

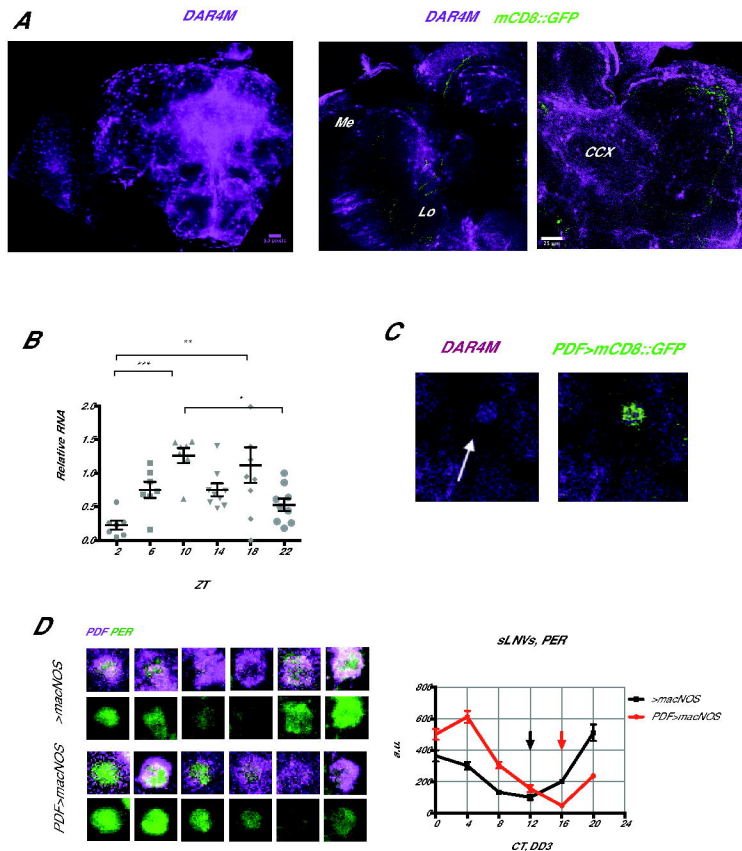

Source: http://biorxiv.org/cgi/reprint/700971v1
